# Supplementary material
Source: Royal Society of Chemistry journal article supplement (doi:10.1039/d5ta09344a)
Supplement: d5ta09344a1.pdf [file d5ta09344a1.pdf]

# Supporting Information:

## Elucidating the carbochromism of $K_3[V(O_2)_4]$

### with *ab initio* modeling

Jacob S. Hirschi, Zhiwei Mao, Anjali Verma, M. A. Subramanian, May Nyman,  
and Tim J. Zuehlsdorff\*

*Department of Chemistry, Oregon State University, Corvallis, Oregon 97331, United States*

E-mail: tim.zuehlsdorff@oregonstate.edu

## Contents

|                                     |             |
|-------------------------------------|-------------|
| <b>1—Experimental Color Details</b> | <b>S-2</b>  |
| <b>2—Tauc Plots</b>                 | <b>S-5</b>  |
| <b>3—Computational Details</b>      | <b>S-6</b>  |
| <b>4—Full Bandstructure</b>         | <b>S-12</b> |
| <b>5—Extended PDOS</b>              | <b>S-16</b> |
| <b>6—3d Orbital Splitting</b>       | <b>S-20</b> |
| <b>7—Functional Benchmarking</b>    | <b>S-22</b> |
| <b>8—References</b>                 | <b>S-26</b> |

## 1—Experimental Color Details

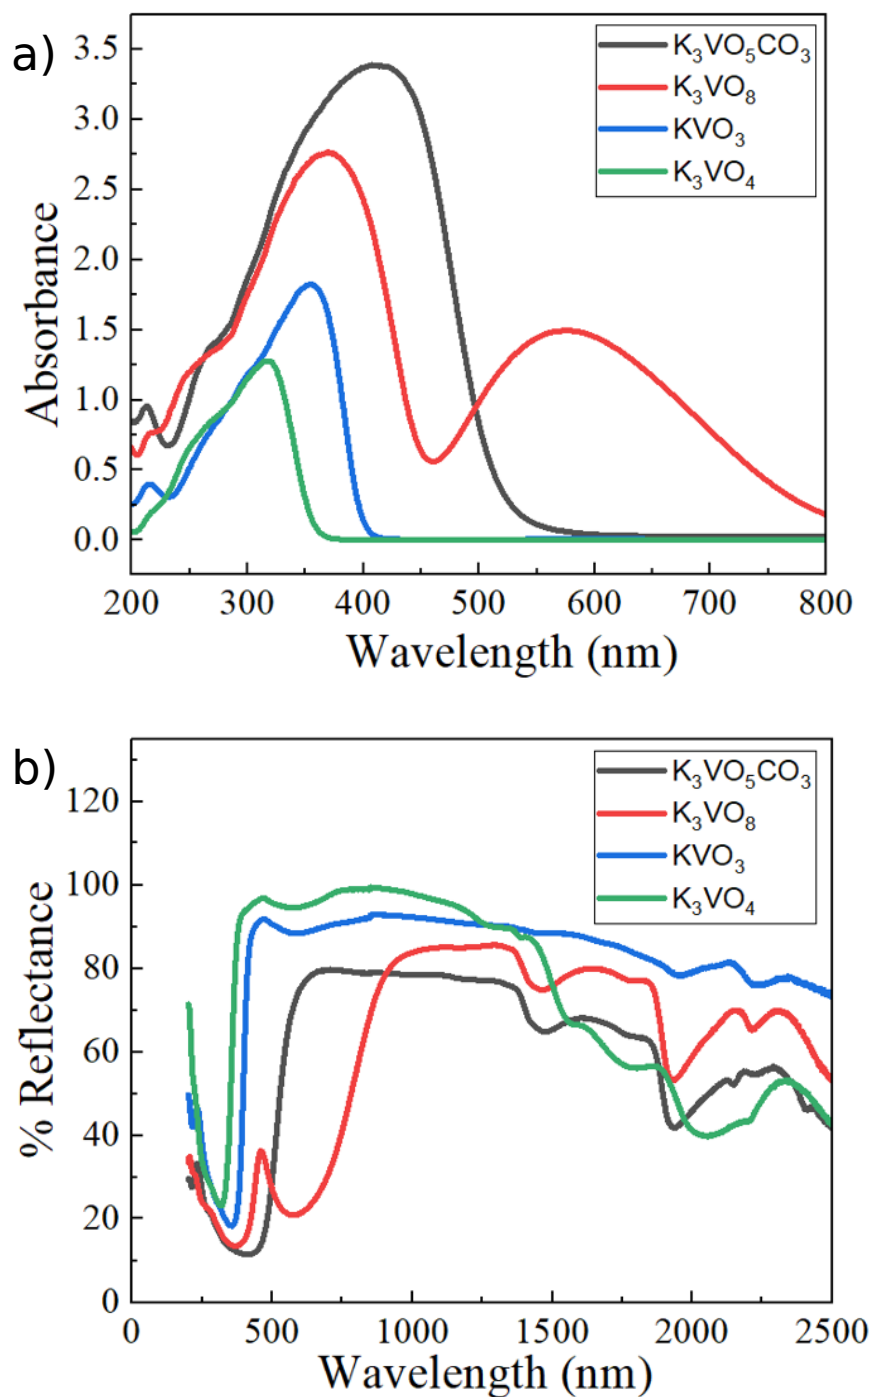

**Figure S1:** Experimental (a) Kubelka-Munk absorbance and (b) diffuse reflectance spectra. The orthovanadate sample,  $K_3[VO_4]$ , exhibited similar properties to the metavanadate and was not considered further.

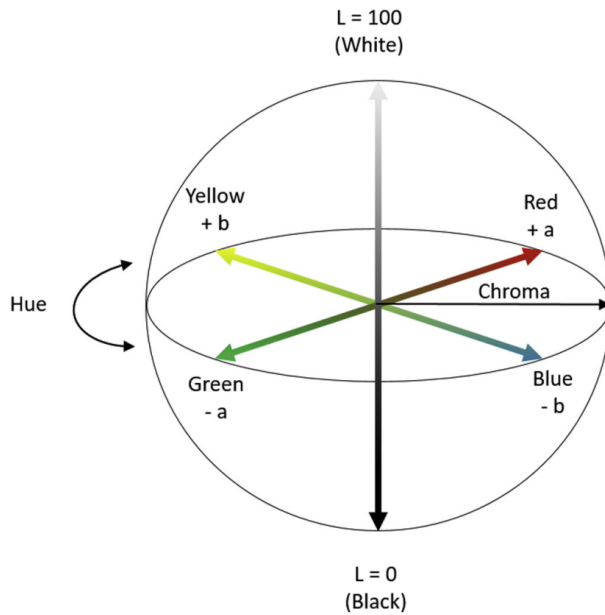

**Figure S2:** CIE L\*a\*b\* color space. Reproduced with permission from ref. S1.

**Table S1:** CIE 1976 L\*a\*b\* and sRGB color coordinates from experiment and theory. Computed with a D65 illuminant and CIE 1931 2° Standard Observer functions.

| Material                       | K <sub>3</sub> [V(O <sub>2</sub> ) <sub>4</sub> ] |        | K <sub>3</sub> [VO(O <sub>2</sub> ) <sub>2</sub> (CO <sub>3</sub> )] |       | K[VO <sub>3</sub> ] |       |
|--------------------------------|---------------------------------------------------|--------|----------------------------------------------------------------------|-------|---------------------|-------|
|                                | Expt.                                             | Sim.   | Expt.                                                                | Sim.  | Expt.               | Sim.  |
| L*                             | 54.86                                             | 60.15  | 81.64                                                                | 86.69 | 95.63               | 99.98 |
| a*                             | 3.06                                              | 9.44   | 3.25                                                                 | 3.09  | -0.39               | -0.28 |
| b*                             | -12.42                                            | -22.71 | 61.25                                                                | 63.14 | -0.71               | 0.65  |
| C*                             | 12.79                                             | 24.59  | 61.34                                                                | 63.22 | 0.81                | 0.71  |
| h°                             | 283.8                                             | 292.6  | 86.96                                                                | 87.20 | 241.2               | 113.3 |
| $\Delta E_{\text{Expt-Sim}}^*$ |                                                   | 13.21  |                                                                      | 5.39  |                     | 4.56  |
| sR                             | 126                                               | 141    | 241                                                                  | 255   | 241                 | 255   |
| sG                             | 131                                               | 141    | 198                                                                  | 212   | 243                 | 255   |
| sB                             | 153                                               | 185    | 83                                                                   | 93    | 244                 | 254   |

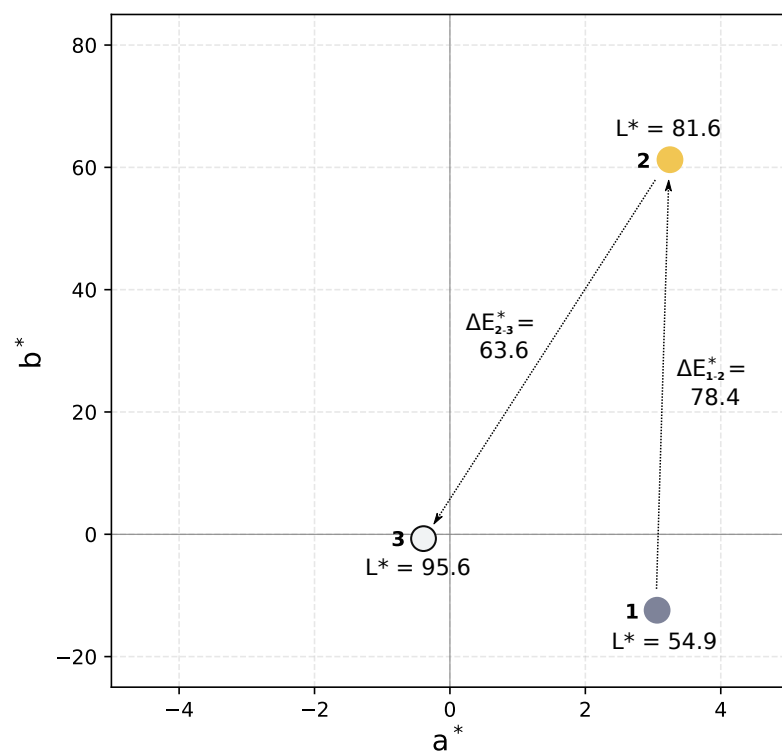

**Figure S3:** Change in experimental CIE  $L^*a^*b^*$  color coordinates from **1** to **2** to **3**.

## 2—Tauc Plots

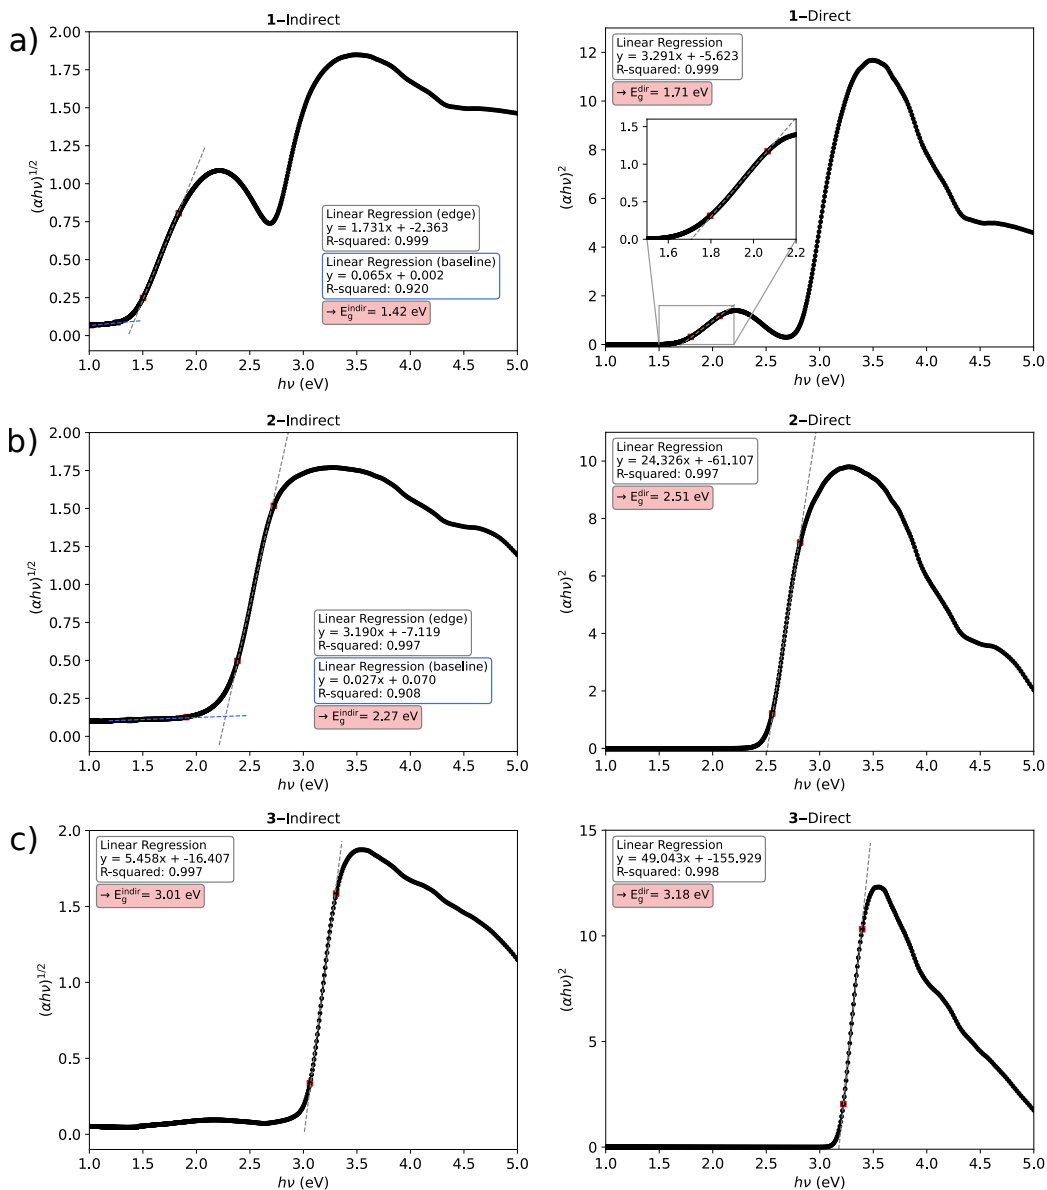

**Figure S4:** Tauc plots from experimental absorption spectra assuming indirect and direct transitions for (a) 1, (b) 2, and (c) 3.

## 3—Computational Details

### Data Availability

To ensure computational reproducibility, all structures used in this work along with input files have been made available with metadata on a public GitHub repository ([https://github.com/tjz21/DAC\\_Color](https://github.com/tjz21/DAC_Color)) and on Zenodo (<https://doi.org/10.5281/zenodo.17136901>).

### DFT Parameters

**Table S2:** Exchange-correlation functional and k-grid combinations.

| Calculation      | XC Functional | Structure       |                        |           |
|------------------|---------------|-----------------|------------------------|-----------|
|                  |               | $K_3[V(O_2)_4]$ | $K_3[VO(O_2)_2(CO_3)]$ | $K[VO_3]$ |
| Optimization     | rSCAN         | 3 x 3 x 3       | 3 x 3 x 3              | 4 x 2 x 4 |
| Bandstructure    | PBE           | 3 x 3 x 3       | 3 x 3 x 3              | 4 x 2 x 4 |
| PDOS/isosurfaces | rSCAN         | 6 x 6 x 6       | 6 x 6 x 6              | 6 x 4 x 6 |
| Absorption       | rSCAN         | 6 x 6 x 6       | 6 x 6 x 6              | 6 x 4 x 6 |

### Metal-Oxygen Bonds

**Table S3:** Selected structural parameters from the computed rSCAN structures.

| Bond                     | $r_{\text{avg}}$ (Å), # Occurrences Per Formula |                        |           |
|--------------------------|-------------------------------------------------|------------------------|-----------|
|                          | $K_3[V(O_2)_4]$                                 | $K_3[VO(O_2)_2(CO_3)]$ | $K[VO_3]$ |
| O–O <sub>peroxo</sub>    | 1.449, 4                                        | 1.443, 2               |           |
| V–O <sub>peroxo</sub>    | 1.903, 8                                        | 1.888, 4               |           |
| V–O <sub>carbonato</sub> |                                                 | 2.033, 2               |           |
| V–O <sub>oxo</sub>       |                                                 | 1.616, 1               | 1.720, 4  |
| V–O <sub>all, avg</sub>  | 1.903                                           | 1.891                  | 1.720     |

### Color Procedure

The procedure for calculating the color of the powder materials from simulated absorption spectra was modified from published reports on color prediction with molecular systems<sup>S2–S5</sup> and is outlined below.

1. Normalize the maximum absorption intensity to unity in the calculated range, 0 to 30 eV.
2. Transform absorbance into reflectance according to the Kubelka-Munk relationship:<sup>S6</sup>

$$R_{\infty} = (\alpha + 1) - \sqrt{(\alpha + 1)^2 - 1}$$

3. Integrate the reflectance curve against the  $\bar{x}, \bar{y}, \bar{z}$  color matching functions and an illuminant factor to account for the spectral distribution of the incident light, yielding XYZ tristimulus values. The CIE 1931 2° Standard Observer functions<sup>S7</sup> and a D65 illuminant were used here.

$$X = \frac{1}{N} \int_{380 \text{ nm}}^{780 \text{ nm}} (R_{\text{material}}) \times (\text{Illuminant}) \times (\bar{x}) \, d\lambda$$

$$Y = \frac{1}{N} \int_{380 \text{ nm}}^{780 \text{ nm}} (R_{\text{material}}) \times (\text{Illuminant}) \times (\bar{y}) \, d\lambda$$

$$Z = \frac{1}{N} \int_{380 \text{ nm}}^{780 \text{ nm}} (R_{\text{material}}) \times (\text{Illuminant}) \times (\bar{z}) \, d\lambda$$

$N$  is an illuminant-dependent constant that normalizes  $Y$  to 100,  $N = \int_{380 \text{ nm}}^{780 \text{ nm}} (\text{Illum.}) \times \bar{y} \, d\lambda$ .

4. Convert CIE 1931 X,Y,Z values into sRGB using the linear transformation matrix<sup>S5</sup>

$$\begin{bmatrix} sR \\ sG \\ sB \end{bmatrix} = \begin{bmatrix} 3.2404542 & -1.5371385 & -0.4985314 \\ -0.9692660 & 1.8760108 & 0.0415560 \\ 0.0556434 & -0.2040259 & 1.0572252 \end{bmatrix} \begin{bmatrix} X \\ Y \\ Z \end{bmatrix}$$

5. Convert CIE 1931 XYZ into CIE 1976 L\*a\*b\* with the following non-linear operations:<sup>S8</sup>

$$L^* = 116f(Y/Y_n) - 16$$

$$a^* = 500[f(X/X_n) - f(Y/Y_n)]$$

$$b^* = 200[f(Y/Y_n) - f(Z/Z_n)]$$

where for values of  $(X/X_n), (Y/Y_n), (Z/Z_n) > (24/116)^3$

$$f(X/X_n) = (X/X_n)^{\frac{1}{3}}$$

$$f(Y/Y_n) = (Y/Y_n)^{\frac{1}{3}}$$

$$f(Z/Z_n) = (Z/Z_n)^{\frac{1}{3}}$$

Alternatively if  $(X/X_n), (Y/Y_n), (Z/Z_n) \leq (24/116)^3$ , then

$$f(X/X_n) = (841/108)(X/X_n) + 16/116$$

$$f(Y/Y_n) = (841/108)(Y/Y_n) + 16/116$$

$$f(Z/Z_n) = (841/108)(Z/Z_n) + 16/116$$

$X_n, Y_n$ , and  $Z_n$  are the X,Y,Z values of the illuminant.

6. Compute the distance between the DFT-derived and experimentally measured  $L^*a^*b^*$  coordinates,  $\Delta E_{\text{Expt-Sim}}^*$ , with the Euclidean distance formula:

$$\Delta E^* = \sqrt{(\Delta L^*)^2 + (\Delta a^*)^2 + (\Delta b^*)^2}$$

Scale the simulated absorption curve and repeat steps 2-4 until  $\Delta E_{\text{Expt-Sim}}^*$  is minimized (see Figure S5).

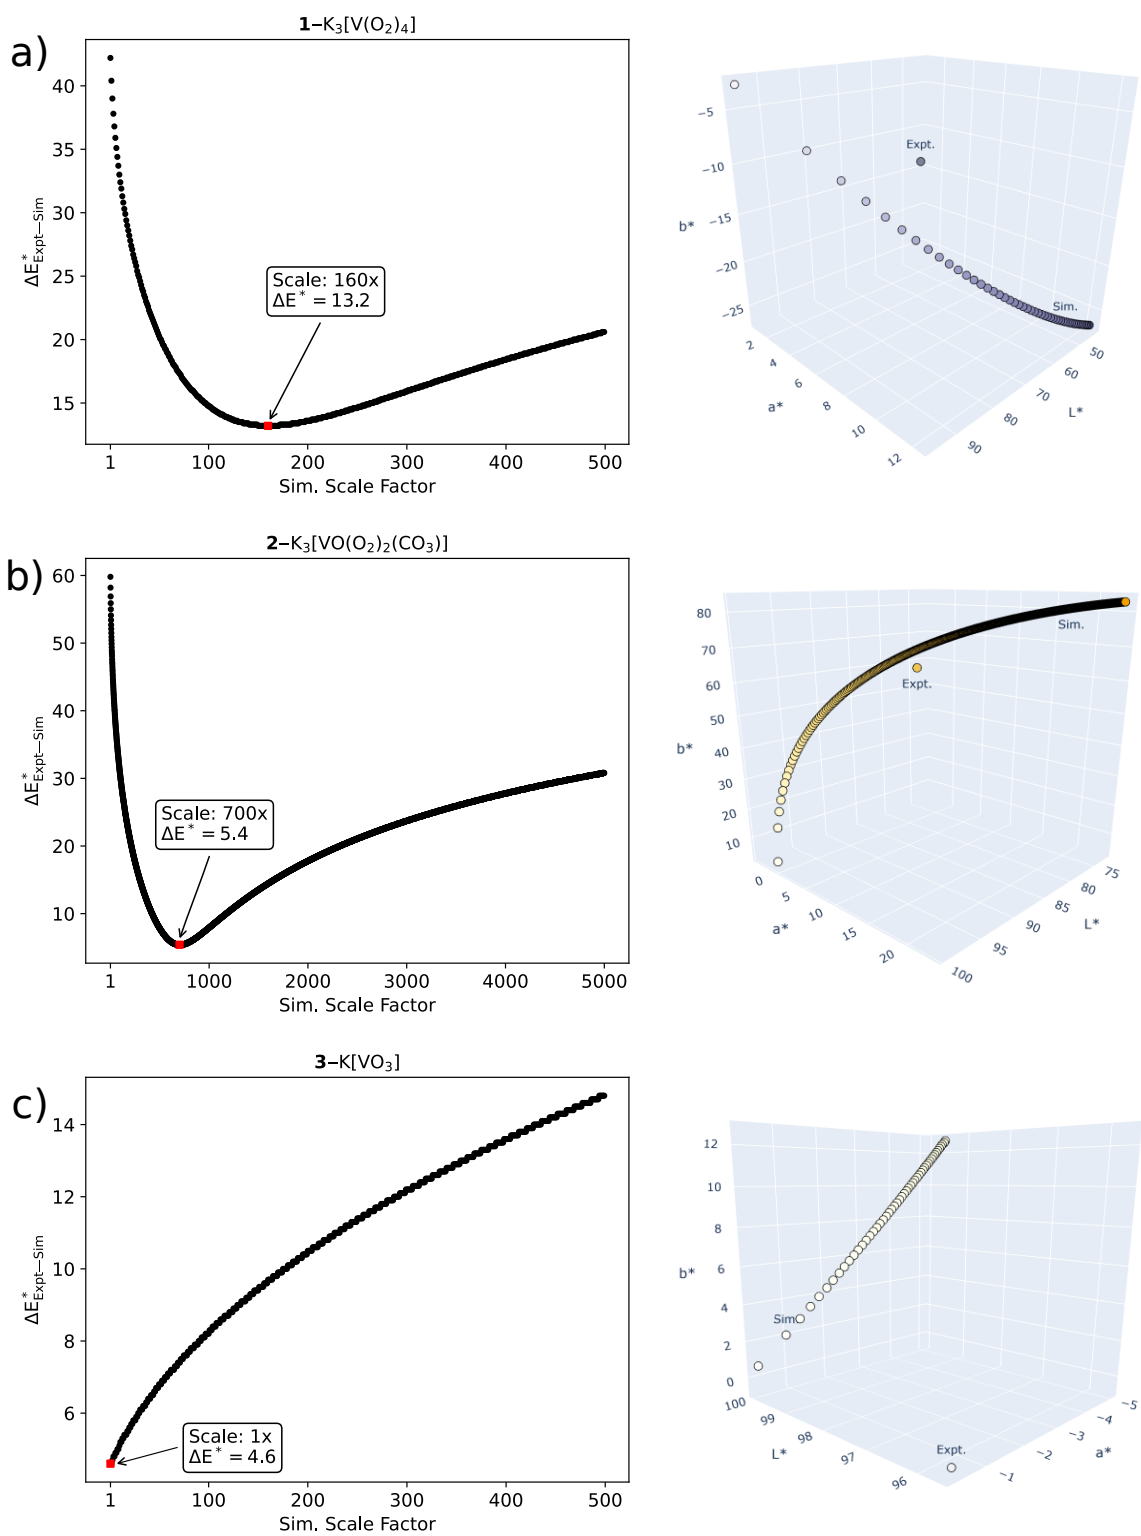

**Figure S5:** Experimental-simulated color distances as a function of simulated absorbance scaling factors for (a) **1**, (b) **2**, and (c) **3** alongside 3D renderings in CIE L\*a\*b\* coordinates.

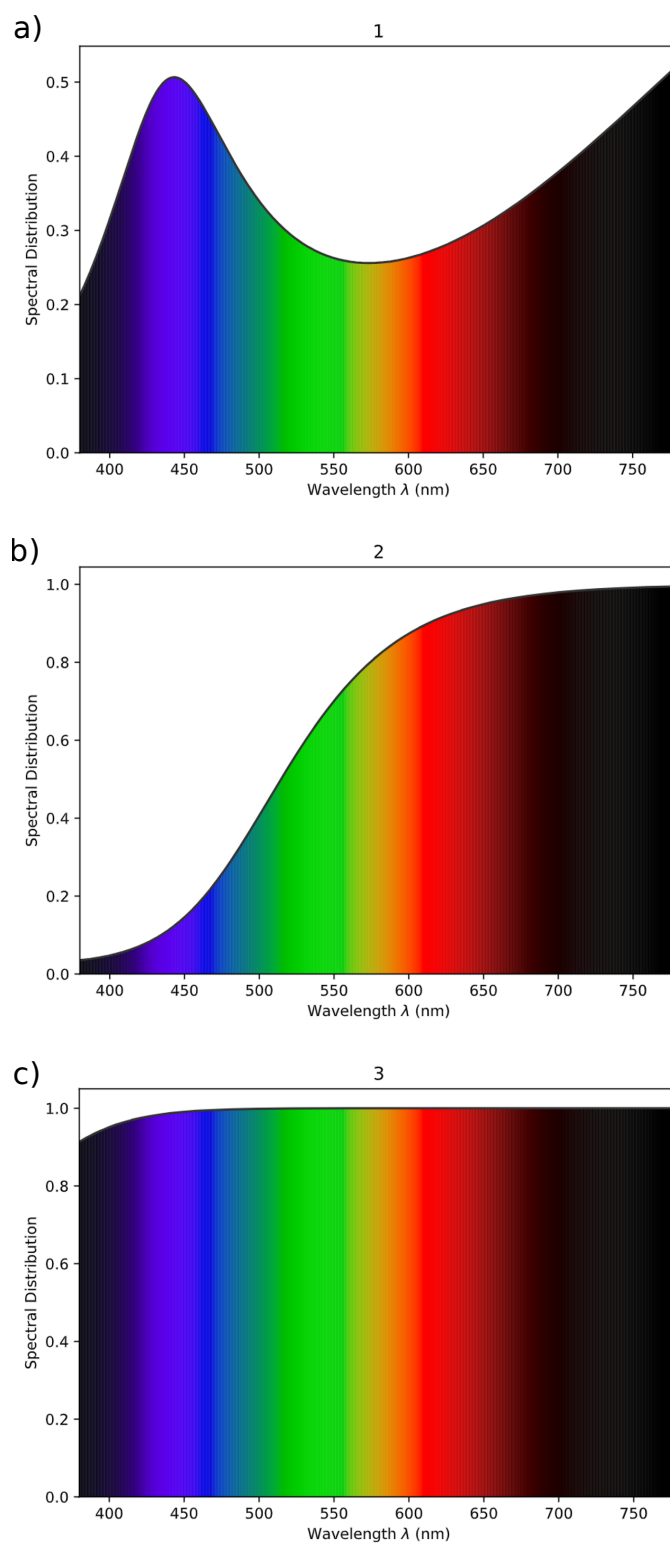

**Figure S6:** Spectral reflectance curves for (a)  $\text{K}_3[\text{V}(\text{O}_2)_4]$  (b)  $\text{K}_3[\text{VO}(\text{O}_2)_2(\text{CO}_3)]$  and (c)  $\text{K}[\text{VO}_3]$  from scaled computational absorbance spectra (Figure S5)

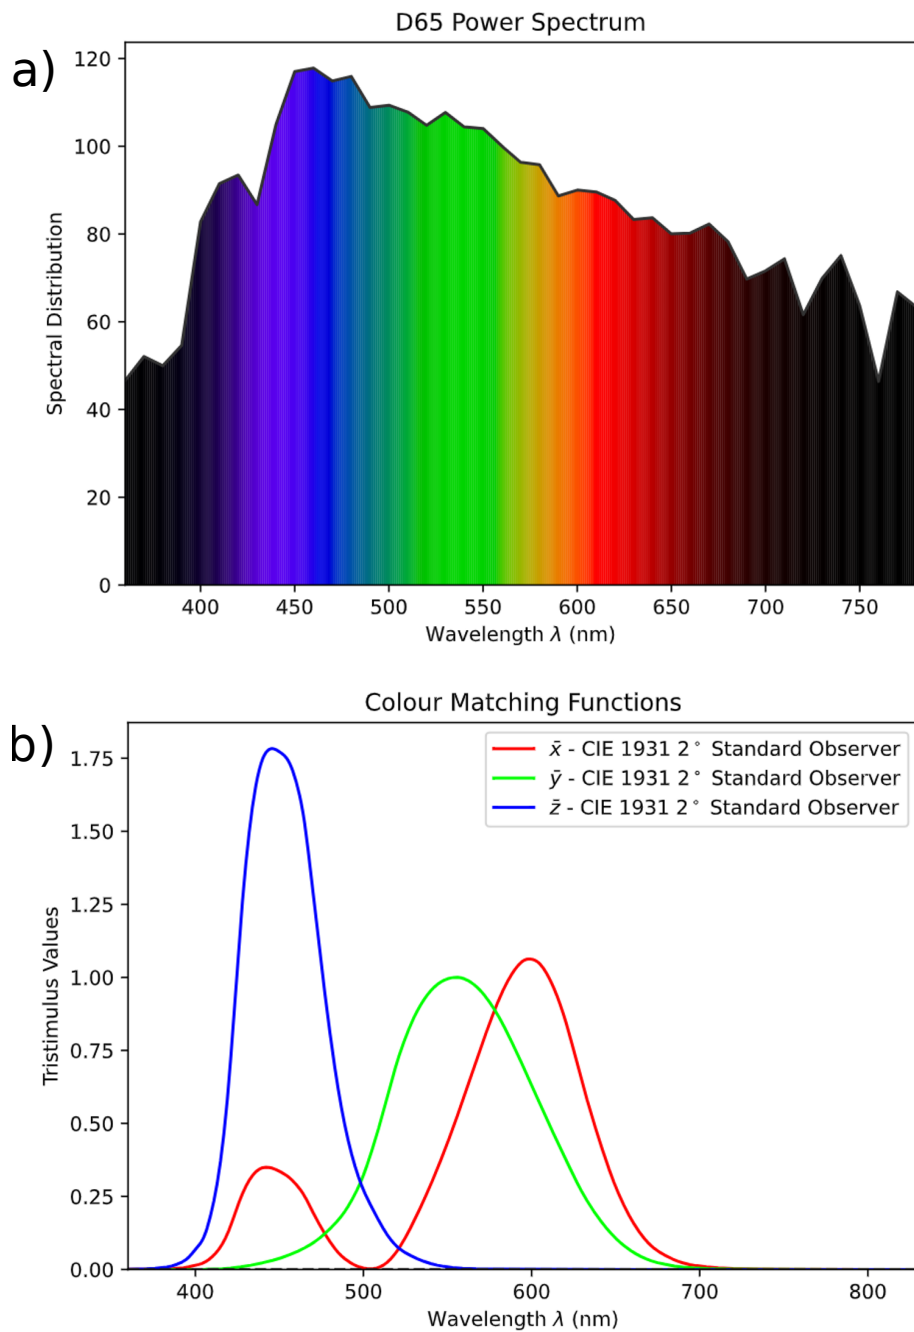

**Figure S7:** (a) Spectral powder distribution of the standard D65 illuminant, which emulates average noon daylight, and (b) CIE 1931 2° color matching functions used for the color prediction in this work. Both figures were made with the Colour python package.<sup>S9</sup>

## 4—Full Bandstructure

Full k-point paths through the Brillouin zone for the tetragonal ( $I42m$ )  $K_3[V(O_2)_4]$ , monoclinic ( $Cm$ )  $K_3[VO(O_2)_2(CO_3)]$ , and orthorhombic ( $Pbcm$ )  $K[VO_3]$  from the Bradley and Cracknell reference text.<sup>S10</sup>

- $K_3[V(O_2)_4]$ :  $\Gamma^*(0\ 0\ 0) \rightarrow X(0\ 0\ \frac{1}{2}) \rightarrow P(\frac{1}{4}\ \frac{1}{4}\ \frac{1}{4}) \rightarrow N(0\ \frac{1}{2}\ 0) \rightarrow \Gamma^*(0\ 0\ 0) \rightarrow Z(\frac{1}{2}\ \frac{1}{2}\ \frac{1}{2})$
- $K_3[VO(O_2)_2(CO_3)]$ :  $\Gamma(0\ 0\ 0) \rightarrow Y(\frac{1}{2}\ \frac{1}{2}\ 0) \rightarrow V(\frac{1}{2}\ 0\ 0) \rightarrow \Gamma(0\ 0\ 0) \rightarrow A^*(0\ 0\ \frac{1}{2}) \rightarrow M(\frac{1}{2}\ \frac{1}{2}\ \frac{1}{2}) \rightarrow L(\frac{1}{2}\ 0\ \frac{1}{2}) \rightarrow V(\frac{1}{2}\ 0\ 0)$
- $K[VO_3]$ :  $\Gamma(0\ 0\ 0) \rightarrow Z(0\ 0\ \frac{1}{2}) \rightarrow T(-\frac{1}{2}\ 0\ \frac{1}{2}) \rightarrow Y^*(-\frac{1}{2}\ 0\ 0) \rightarrow S(-\frac{1}{2}\ \frac{1}{2}\ 0) \rightarrow R(-\frac{1}{2}\ \frac{1}{2}\ \frac{1}{2}) \rightarrow U(0\ \frac{1}{2}\ \frac{1}{2}) \rightarrow X(0\ \frac{1}{2}\ 0) \rightarrow \Gamma(0\ 0\ 0) \rightarrow Y^*(-\frac{1}{2}\ 0\ 0)$

The lowest energy direct transitions occur at k-points denoted with \*. Bandstructure diagrams made with sumo<sup>S11</sup> with the VBM shifted to zero. Specific commands used to generate these diagrams are provided on GitHub ([https://github.com/tjz21/DAC\\_Color/blob/main/computational/plotting\\_commands.md](https://github.com/tjz21/DAC_Color/blob/main/computational/plotting_commands.md)).

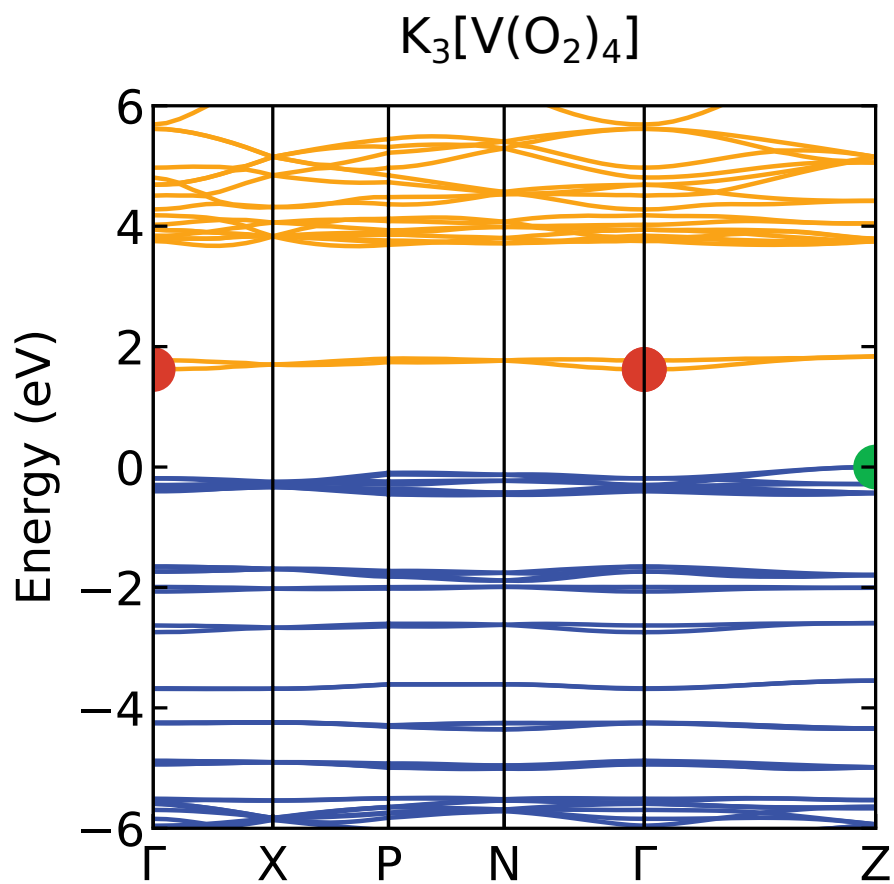

**Figure S8:** Bandstructure of **1** with occupied and unoccupied bands shown in blue and orange, respectively. Band extrema are depicted as colored dots. Bands were computed with PBE and scissor operated by +0.32 eV to match the indirect rSCAN gap of 1.62 eV ( $Z \rightarrow \Gamma$ ).

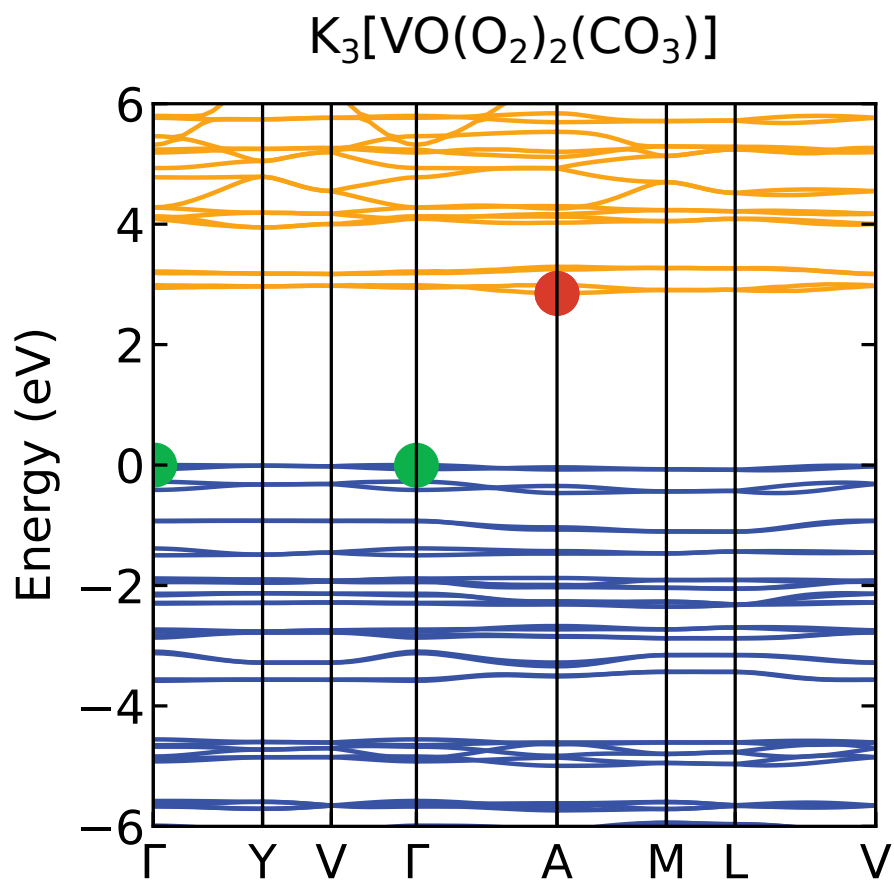

**Figure S9:** Bandstructure of **2** with occupied and unoccupied bands shown in blue and orange, respectively. Band extrema are depicted as colored dots. Bands were computed with PBE and scissor operated by +0.30 eV to match the indirect rSCAN gap of 2.85 eV ( $\Gamma \rightarrow \text{A}$ ).

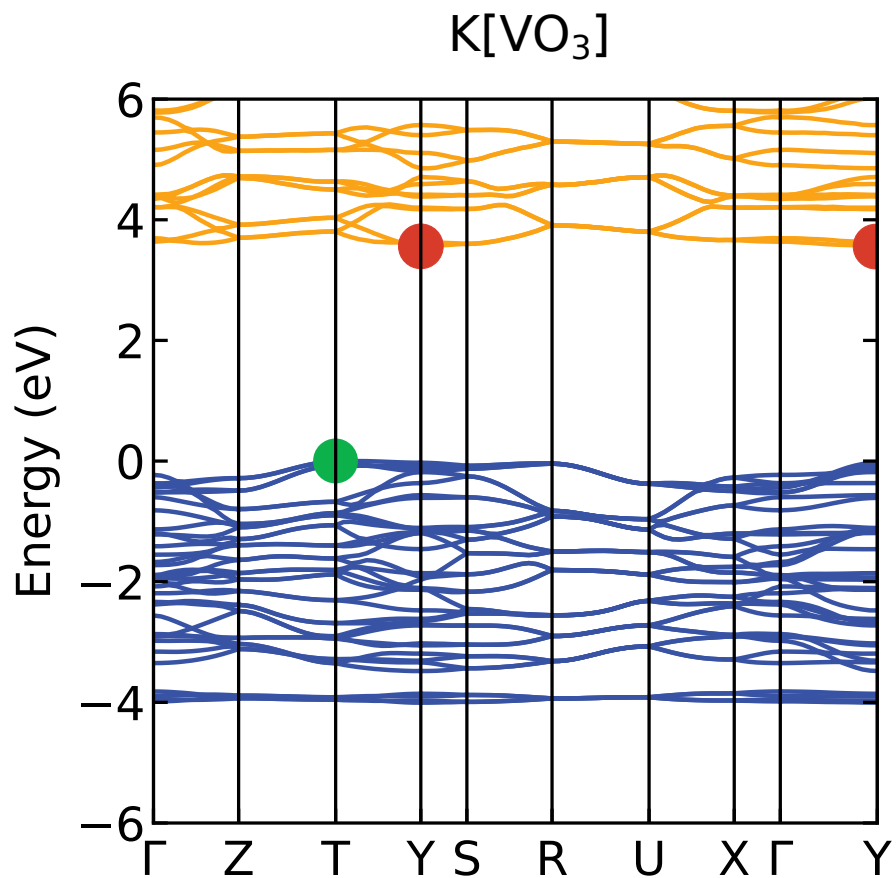

**Figure S10:** Bandstructure of **3** with occupied and unoccupied bands shown in blue and orange, respectively. Band extrema are depicted as colored dots. Bands were computed with PBE and scissor operated by +0.33 eV to match the indirect rSCAN gap of 3.57 eV (T  $\rightarrow$  Y).

## 5—Extended PDOS

Extended PDOS diagrams from -6 eV to 6 eV were made with sumo<sup>S11</sup> and the VBM were shifted to zero. A gaussian broadening of 0.1 eV was applied. Specific commands used to generate these diagrams are provided on GitHub ([https://github.com/tjz21/DAC\\_Color/blob/main/computational/plotting\\_commands.md](https://github.com/tjz21/DAC_Color/blob/main/computational/plotting_commands.md)).

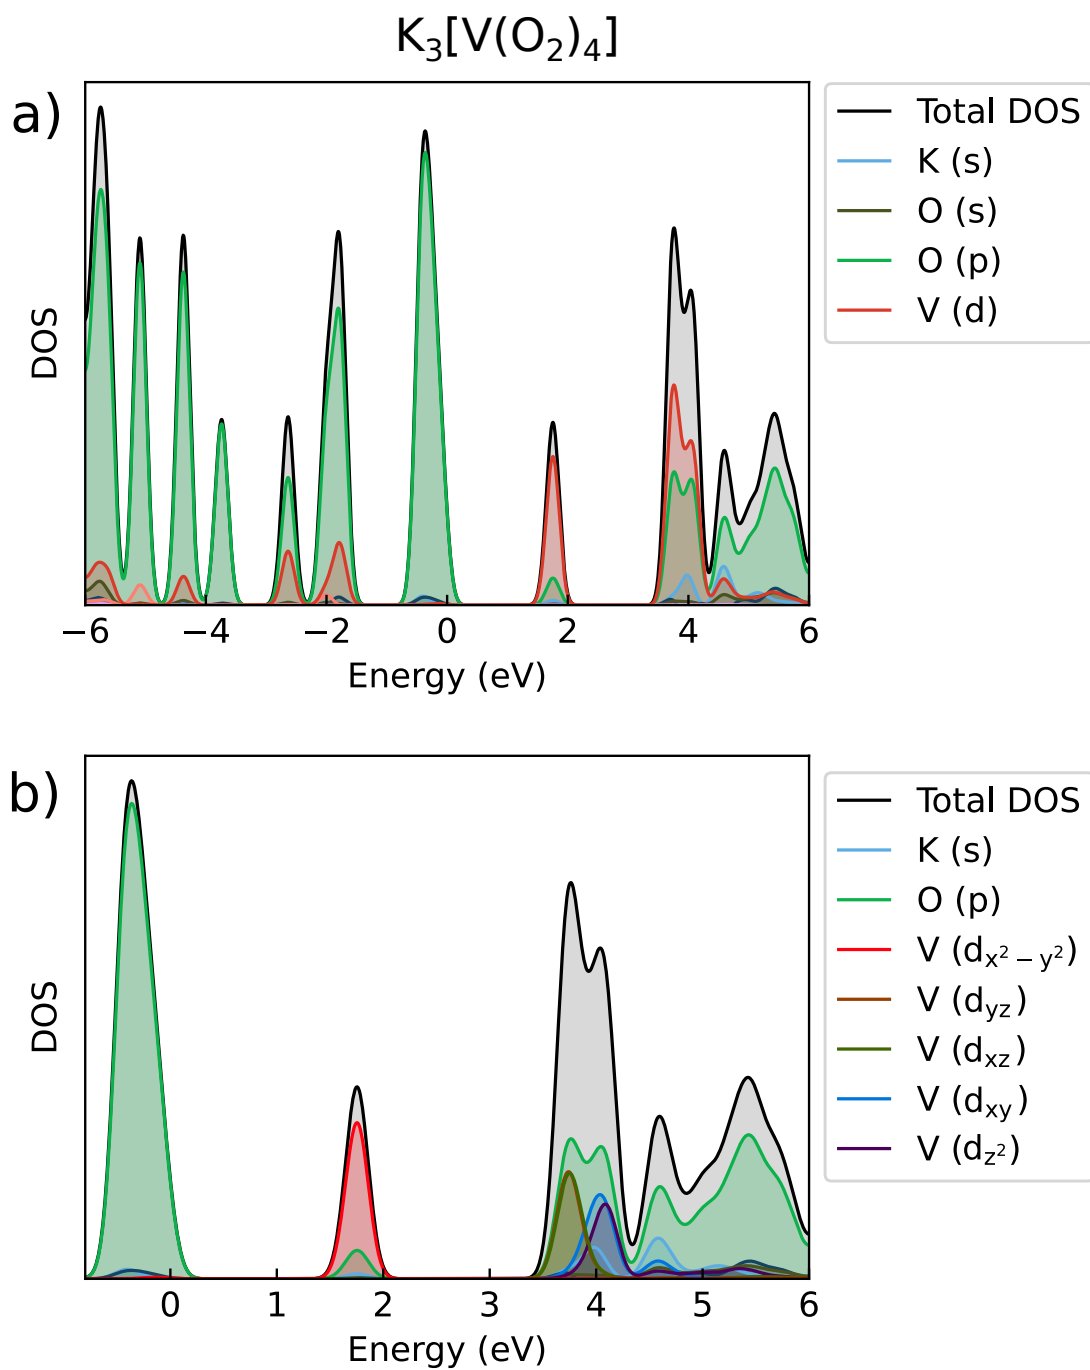

**Figure S11:** (a) PDOS of  $\text{K}_3[\text{V}(\text{O}_2)_4]$  showing atomic contributions, and (b) PDOS with angular momentum projections for vanadium-3d states. Computed with rSCAN.

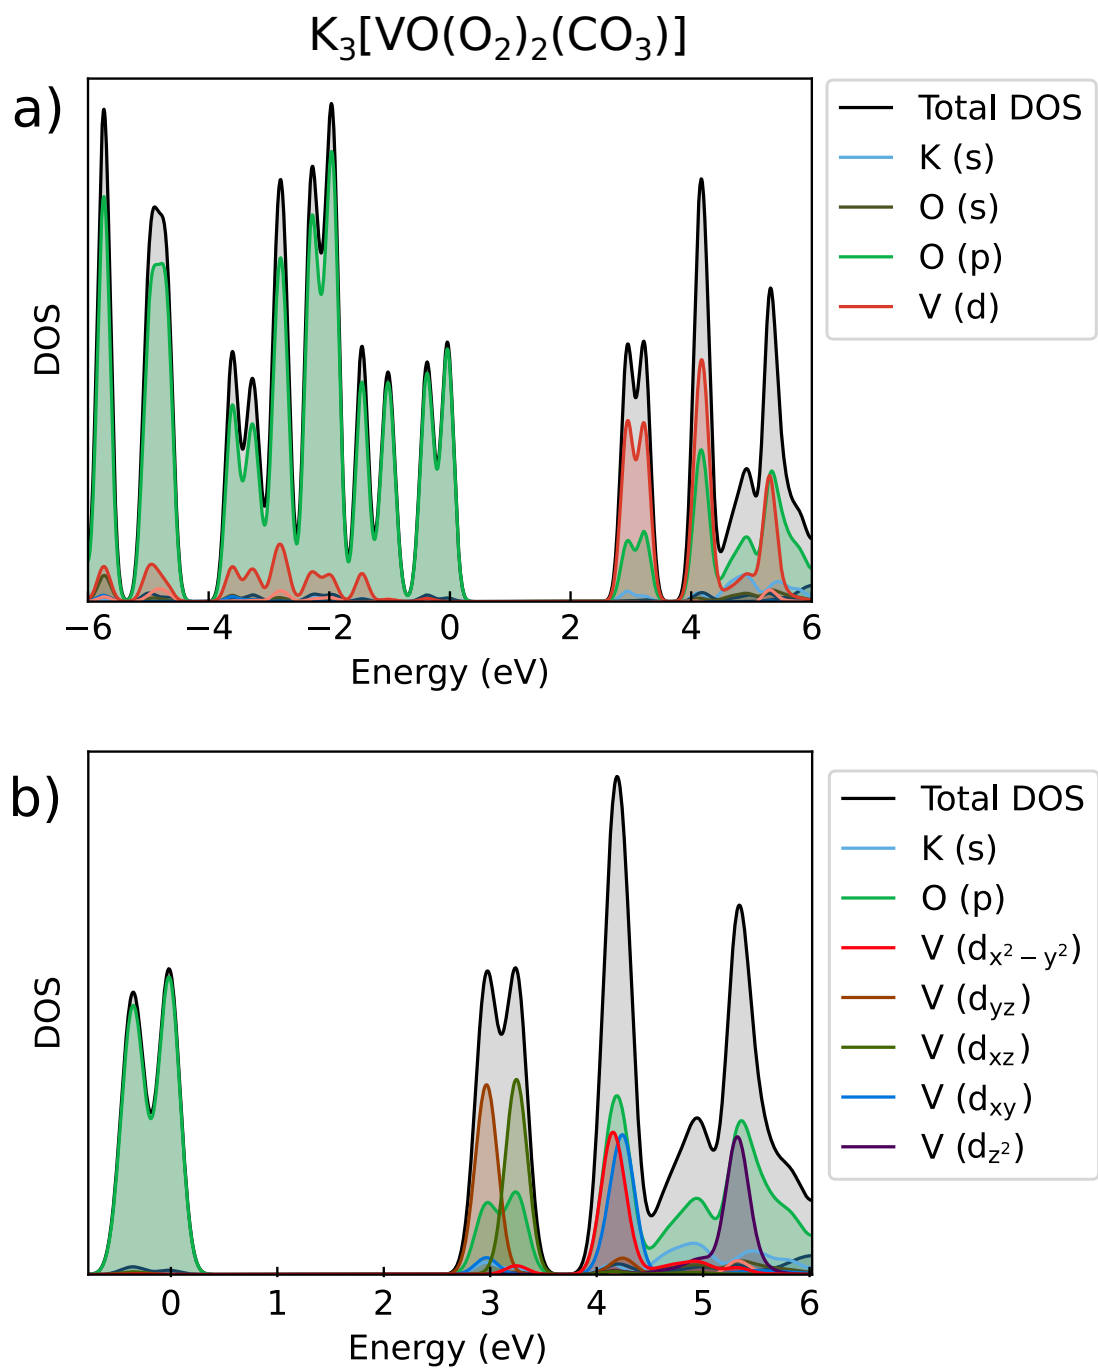

**Figure S12:** (a) PDOS of  $\text{K}_3[\text{VO}(\text{O}_2)_2(\text{CO}_3)]$  showing atomic contributions, and (b) PDOS with angular momentum projections for vanadium-3d states. Computed with rSCAN.

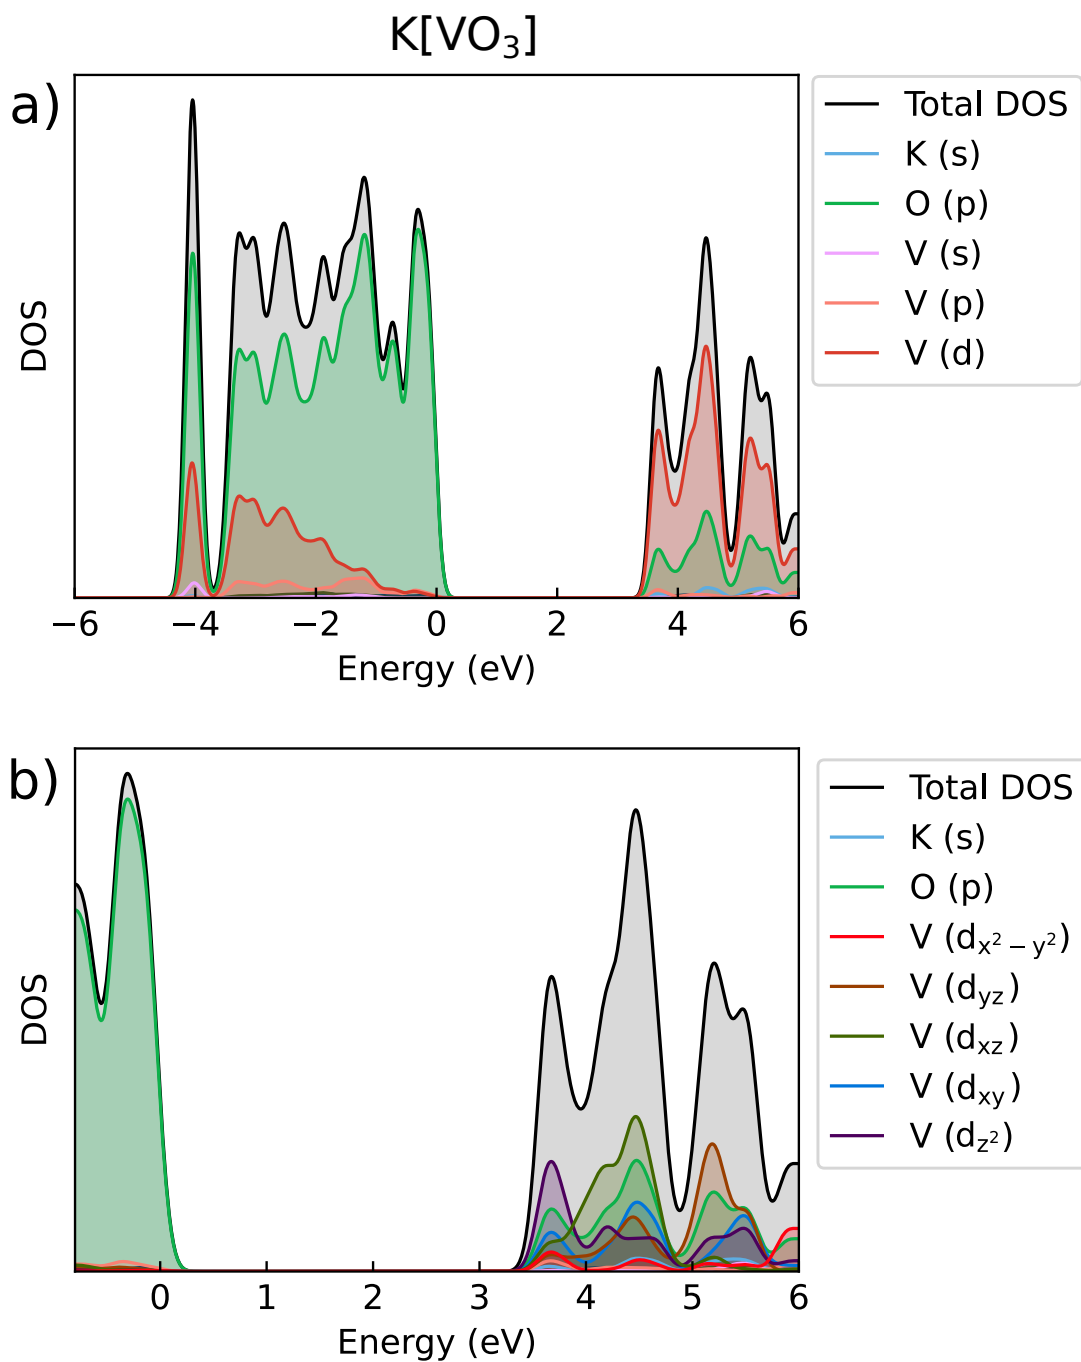

**Figure S13:** (a) PDOS of K[VO<sub>3</sub>] showing atomic contributions, and (b) PDOS with angular momentum projections for vanadium-3d states. Computed with rSCAN.

## 6—3d Orbital Splitting

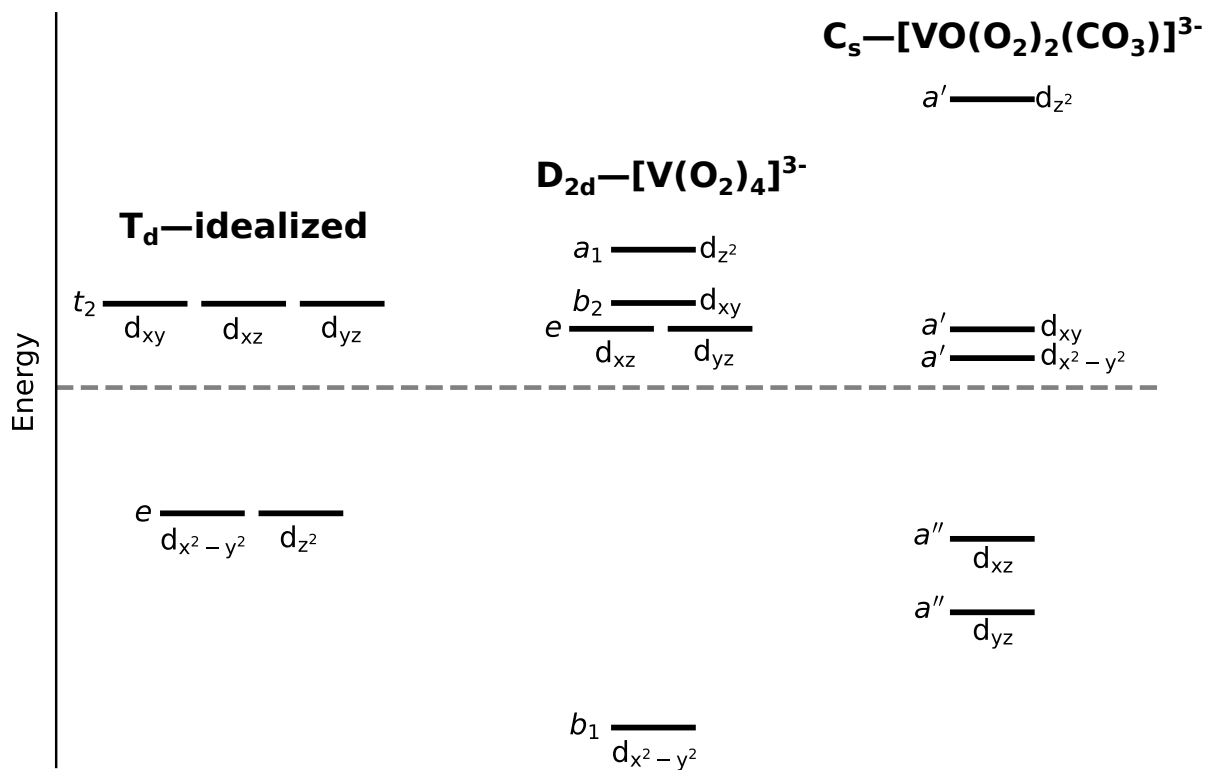

**Figure S14:** 3d orbital splitting diagram based on the DFT calculations for  $\text{K}_3[\text{V}(\text{O}_2)_4]$  and  $\text{K}_3[\text{VO}(\text{O}_2)_2(\text{CO}_3)]$ . The barycenter of the splitting is indicated by a dashed line.

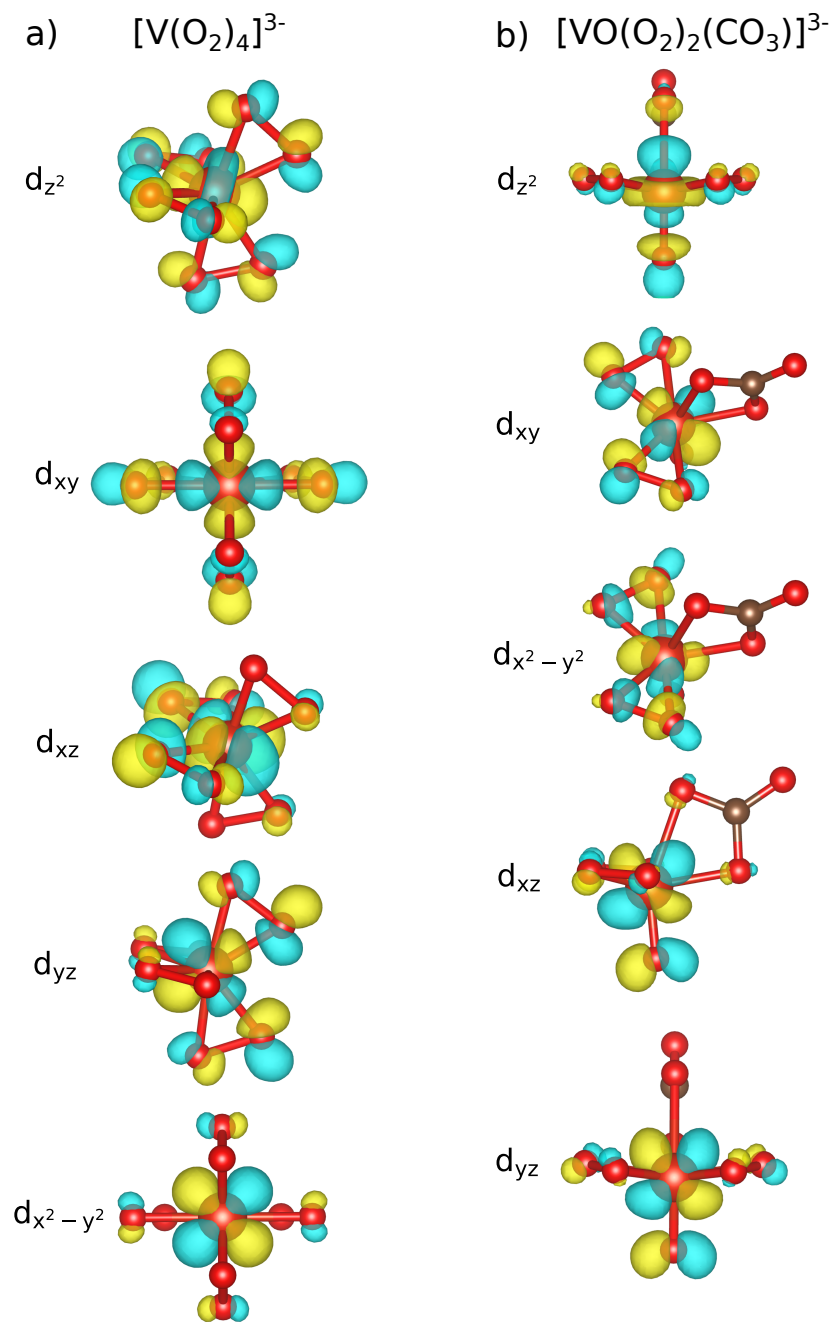

**Figure S15:** Isosurface renderings of the unoccupied vanadium 3d orbitals in  $\text{K}_3[\text{V}(\text{O}_2)_4]$  and  $\text{K}_3[\text{VO}(\text{O}_2)_2(\text{CO}_3)]$  from rSCAN calculations. Potassium counterions have been omitted for clarity.

## 7—Functional Benchmarking

**Table S4:** Direct band gaps from experiment and simulation.

| Material                                                      | Expt. | Direct- $E_g$ (eV) |                 |                 |
|---------------------------------------------------------------|-------|--------------------|-----------------|-----------------|
|                                                               |       | PBE (% Error)      | rSCAN (% Error) | HSE06 (% Error) |
| <b>1</b> - $\text{K}_3[\text{V}(\text{O}_2)_4]$               | 1.71  | 1.44 (-15.6%)      | 1.82 (+6.4%)    | 3.55 (+107.4%)  |
| <b>2</b> - $\text{K}_3[\text{VO}(\text{O}_2)_2(\text{CO}_3)]$ | 2.51  | 2.53 (+0.9%)       | 2.89 (+15.1%)   | 4.60 (+83.3%)   |
| <b>3</b> - $\text{K}[\text{VO}_3]$                            | 3.18  | 3.22 (+1.2%)       | 3.59 (+12.9%)   | 5.00 (+57.5%)   |

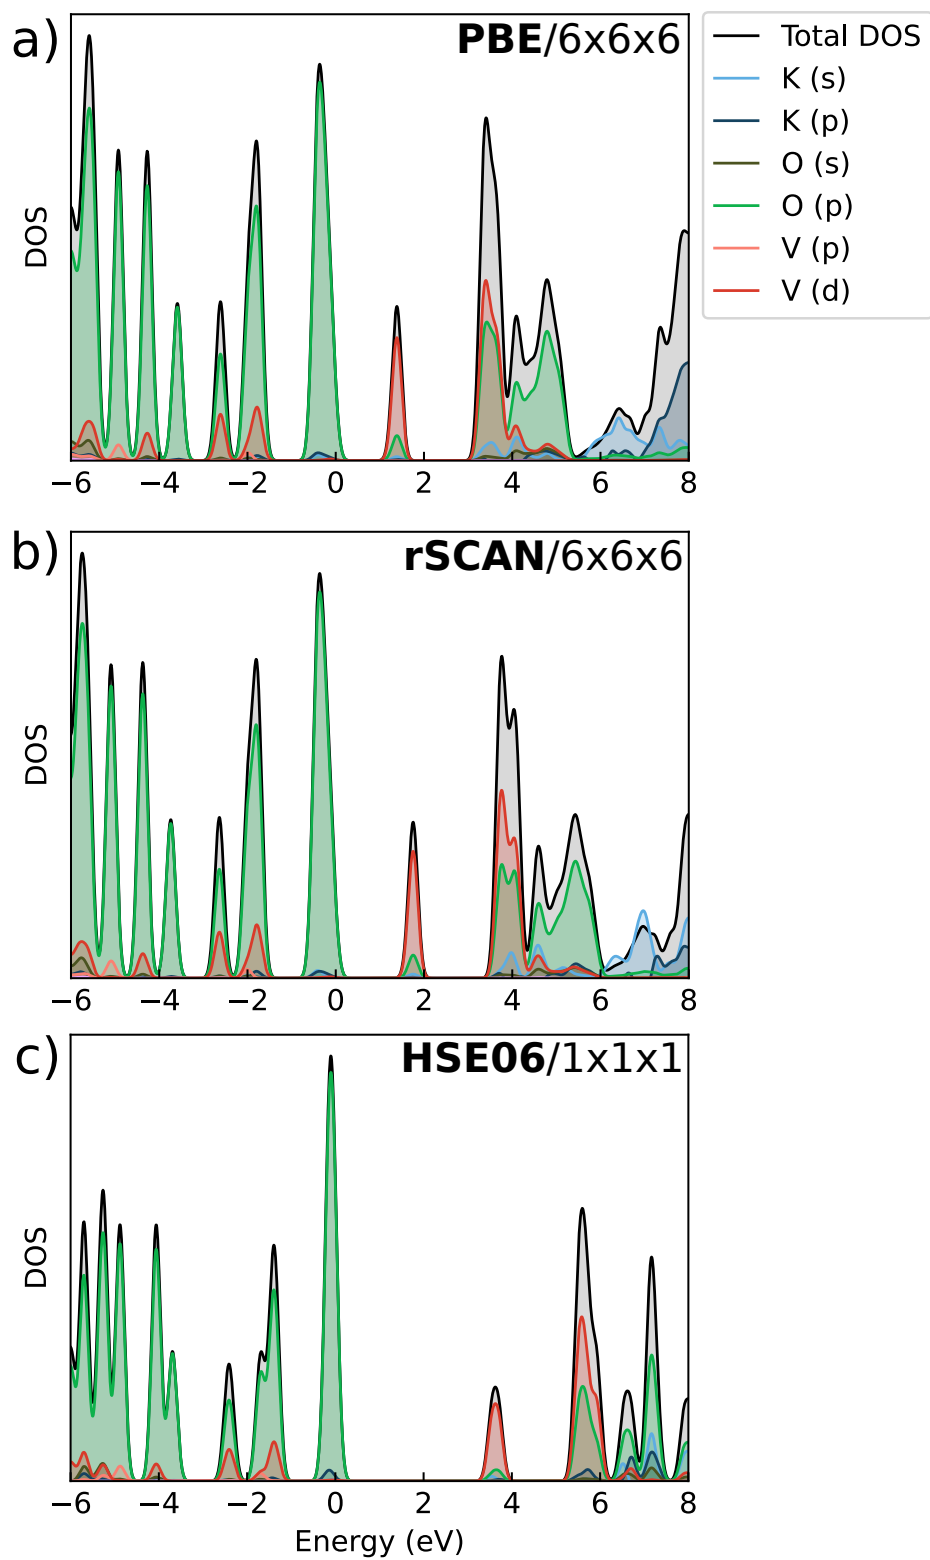

**Figure S16:** PDOS of  $K_3[V(O_2)_4]$  with three functional/k-grid combinations. All computed from the rSCAN/3x3x3 optimized structure.

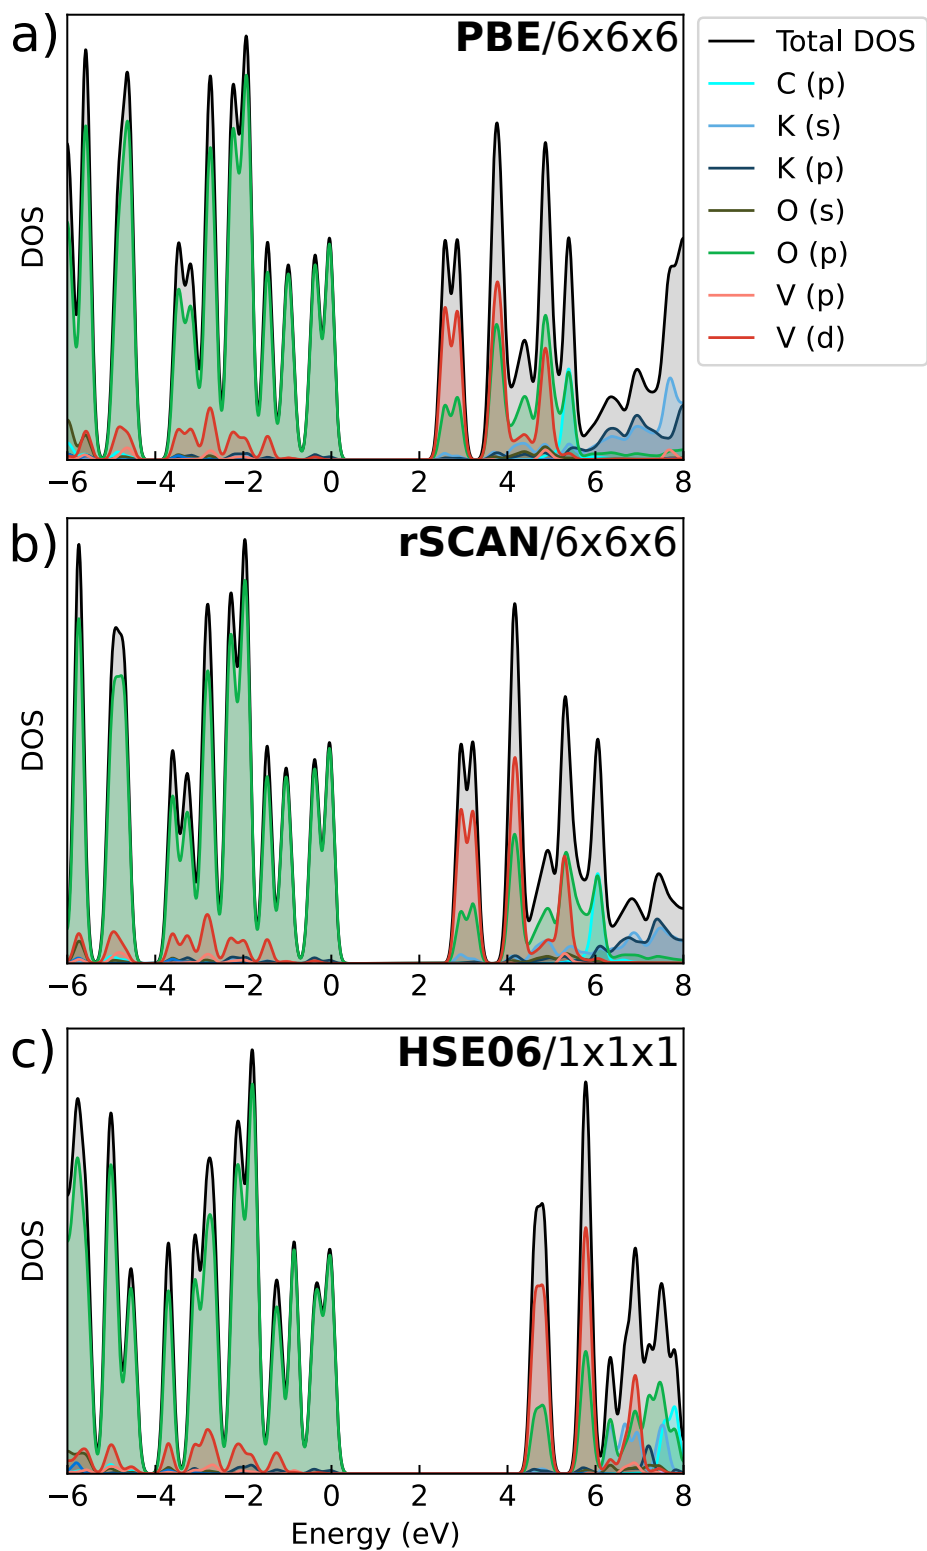

**Figure S17:** PDOS of  $K_3[VO(O_2)_2(CO_3)]$  with three functional/k-grid combinations. All computed from the rSCAN/3x3x3 optimized structure.

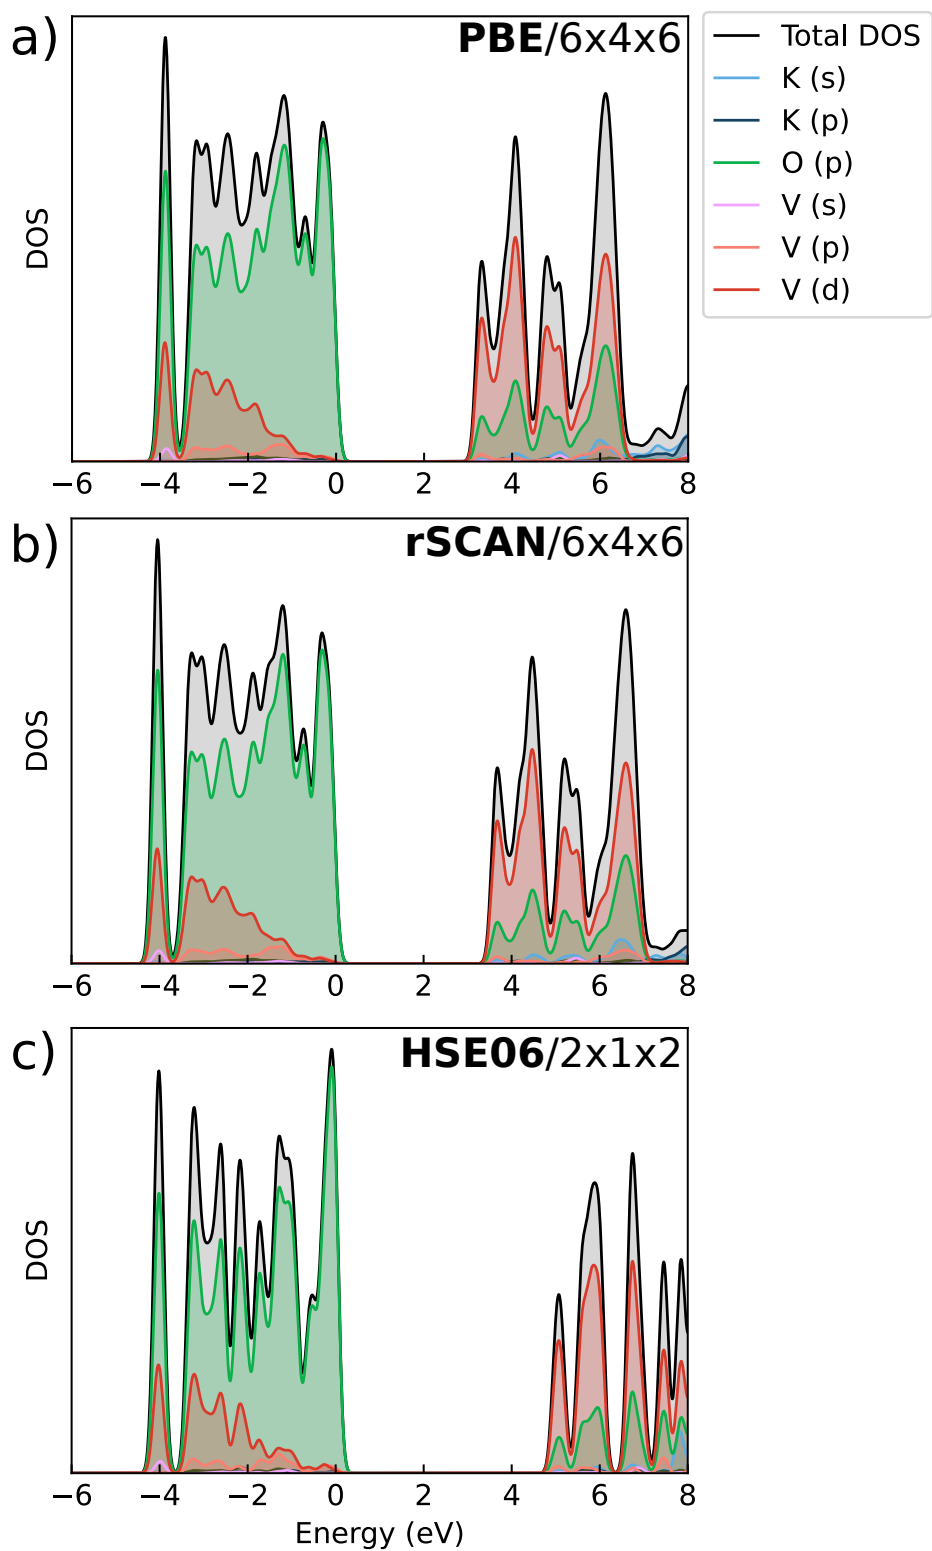

**Figure S18:** PDOS of  $\text{K}[\text{VO}_3]$  with three functional/k-grid combinations. All computed from the rSCAN/4x2x4 optimized structure.

## References

- (S1) Ly, B. C. K.; Dyer, E. B.; Feig, J. L.; Chien, A. L.; Del Bino, S. Research Techniques Made Simple: Cutaneous Colorimetry: A Reliable Technique for Objective Skin Color Measurement. *J. Investig. Dermatol.* **2020**, *140*, 3–12, DOI: doi:10.1016/j.jid.2019.11.003.
- (S2) Zuehlsdorff, T. J.; Haynes, P. D.; Payne, M. C.; Hine, N. D. M. Predicting solvatochromic shifts and colours of a solvated organic dye: The example of nile red. *J. Chem. Phys.* **2017**, *146*, 124504, DOI: doi:10.1063/1.4979196.
- (S3) Ge, X.; Timrov, I.; Binnie, S.; Biancardi, A.; Calzolari, A.; Baroni, S. Accurate and Inexpensive Prediction of the Color Optical Properties of Anthocyanins in Solution. *J. Phys. Chem. A* **2015**, *119*, 3816–3822, DOI: doi:10.1021/acs.jpca.5b01272.
- (S4) Malcıoğlu, O. B.; Calzolari, A.; Gebauer, R.; Varsano, D.; Baroni, S. Dielectric and Thermal Effects on the Optical Properties of Natural Dyes: A Case Study on Solvated Cyanin. *J. Am. Chem. Soc.* **2011**, *133*, 15425–15433, DOI: doi:10.1021/ja201733v.
- (S5) Williams, D. L.; Flaherty, T. J.; Jupe, C. L.; Coleman, S. A.; Marquez, K. A.; Stanton, J. J. Beyond  $\lambda_{\max}$ : Transforming Visible Spectra into 24-Bit Color Values. *J. Chem. Educ.* **2007**, *84*, 1873, DOI: doi:10.1021/ed084p1873.
- (S6) Kubelka, P.; Munk, F. An article on optics of paint layers. *Z. Tech. Phys* **1931**, *12*, 259–274.
- (S7) Smith, T.; Guild, J. The C.I.E. colorimetric standards and their use. *Trans. Opt. Soc* **1931**, *33*, 73–134, DOI: doi:10.1088/1475-4878/33/3/301.
- (S8) Schanda, J. *Colorimetry: Understanding the CIE System*; John Wiley & Sons: Hoboken, NJ, 2007; DOI: doi:10.1002/9780470175637.
- (S9) Mansencal, T.; Mauderer, M.; Parsons, M.; Shaw, N.; Wheatley, K.; Cooper, S.; Vandenberg, J. D.; Canavan, L.; Crowson, K.; Lev, O. et al. Colour 0.4.6. 2024; <https://doi.org/10.5281/zenodo.13917514>.

- (S10) Bradley, C.; Cracknell, A. *The Mathematical Theory of Symmetry in Solids: Representation Theory for Point Groups and Space Groups*; EBSCO ebook academic collection; OUP Oxford, 2010.
- (S11) M Ganose, A.; J Jackson, A.; O Scanlon, D. sumo: Command-line tools for plotting and analysis of periodic ab initio calculations. *J. Open Source Softw.* **2018**, *3*, 717, DOI: doi:10.21105/joss.00717.
